# Supplementary material for: Omicron Variant Escapes Therapeutic Monoclonal Antibodies (mAbs) Including Recently Released Evusheld®, Contrary to 8 Prior Main Variant of Concern (VOC)
Source: PubMed Central journal article supplement (PMC9402686; doi:10.1093/cid/ciac143), 2022-02-16
Supplement: ciac143_suppl_supplementary_table_s3.pdf [file ciac143_suppl_supplementary_table_s3.pdf]

# Supplementary data S3

| Sequence name (including GISAID)      | Nexstrain clade | Pangolin lineage | IHU name   | Nucleotide substitutions | Nucleotide deletions | Amino acid substitutions | Amino acid deletions | Nucleotide substitutions                                                                                                                                                                                                                                                                       | Nucleotide deletions                                      | Amino acid substitutions                                                                                                                                                                                                                                                                                     | Amino acid deletions                                                                          |
|---------------------------------------|-----------------|------------------|------------|--------------------------|----------------------|--------------------------|----------------------|------------------------------------------------------------------------------------------------------------------------------------------------------------------------------------------------------------------------------------------------------------------------------------------------|-----------------------------------------------------------|--------------------------------------------------------------------------------------------------------------------------------------------------------------------------------------------------------------------------------------------------------------------------------------------------------------|-----------------------------------------------------------------------------------------------|
| IHUMI-717_EPI_ISL_8033347 2020-03-26  | 20B             | B.1.1            | IHUMI-717  | 12                       | 0                    | 7                        | 0                    | C241T, C313T, C3037T, A7903G, C14408T, G19518T, A23403G, G26143T, G28845T, G28881A, G28882A, G28883C                                                                                                                                                                                           |                                                           | N:R191L, N:R203K, N:G204R, ORF1b:P314L, ORF1b:L2017F, ORF3a:G251C, S:D614G                                                                                                                                                                                                                                   |                                                                                               |
| IHUMI-2096_EPI_ISL_8033348 2020-08-06 | 20A             | B.1.160          | IHUMI-2096 | 20                       | 15                   | 11                       | 5                    | C241T, C3037T, C4543T, G5629T, G9526T, C11497T, G13993T, C14408T, G15766T, A16889G, G17019T, C18877T, G22992A, A23403G, G25563T, C25710T, C26735T, T26876C, G28975C, G29399A                                                                                                                   | 23585-23599                                               | N:M234I, N:A376T, ORF1a:M3087I, ORF1b:A176S, ORF1b:P314L, ORF1b:V767L, ORF1b:K1141R, ORF1b:E1184D, ORF3a:Q57H, S:S477N, S:D614G                                                                                                                                                                              | S:Q675-, S:T676-, S:Q677-, S:T678-, S:N679-                                                   |
| IHUMI-3076_EPI_ISL_982232 2021-01-08  | 20I (Alpha, V1) | B.1.1.7          | IHUMI-3076 | 31                       | 25                   | 20                       | 8                    | C241T, C913T, A1399G, C3037T, C3267T, C5388A, C5986T, T6954C, C14408T, C14676T, C15279T, T16176C, A17615G, A23063T, C23271A, A23403G, C23604A, C23709T, T24506G, G24914C, G26730C, C27972T, G28048T, A28111G, G28280C, A28281T, T28282A, G28881A, G28882A, G28883C, C28977T                    | 11288-11296, 12041-12046, 21765-21770, 21992-21994, 28271 | M:V70L, N:D3L, N:R203K, N:G204R, N:S235F, ORF1a:T1001I, ORF1a:A1708D, ORF1a:I2230T, ORF1b:P314L, ORF1b:K1383R, ORF8:Q27*, ORF8:R52I, ORF8:Y73C, S:N501Y, S:A570D, S:D614G, S:P681H, S:T716I, S:S982A, S:D1118H                                                                                               | ORF1a:S3675-, ORF1a:G3676-, ORF1a:F3677-, ORF1a:D3926-, ORF1a:I3927-, S:H69-, S:V70-, S:Y144- |
| IHUMI-3147_EPI_ISL_8033349 2021-01-22 | 20H (Beta, V2)  | B.1.351.2        | IHUMI-3147 | 26                       | 18                   | 18                       | 6                    | G174T, C241T, C1059T, A2692T, C3037T, G5230T, A8052G, A10323G, G10396T, C10632T, C14408T, C21614T, A21801C, A22206G, G22813T, G23012A, A23063T, A23403G, T23560C, C23664T, G25563T, C25904T, C26456T, C28253T, T28729C, C28887T                                                                | 11288-11296, 22283-22291                                  | E:P71L, N:T205I, ORF1a:T265I, ORF1a:K1655N, ORF1a:N2596S, ORF1a:K3353R, ORF1a:A3456V, ORF1b:P314L, ORF3a:Q57H, ORF3a:S171L, S:L18F, S:D80A, S:D215G, S:K417N, S:E484K, S:N501Y, S:D614G, S:A701V                                                                                                             | ORF1a:S3675-, ORF1a:G3676-, ORF1a:F3677-, S:L241-, S:L242-, S:A243-                           |
| IHUMI-3630_EPI_ISL_8033350 2021-06-07 | 21I (Delta)     | AY.71            | IHUMI-3630 | 33                       | 13                   | 27                       | 4                    | G210T, C241T, C2509T, C3037T, C5184T, A5584G, C9891T, T11418C, C11514T, C13019T, C14408T, G15451A, C16466T, C16726T, A18931G, C19118T, C21618G, G21987A, C22227T, T22917G, C22995A, A23403G, G24410A, C25317T, C25469T, C26753T, T26767C, T27638C, C27752T, A28461G, G28881T, G29402T, G29742T | 22029-22034, 28248-28253, 28271                           | M:I82T, N:D63G, N:R203M, N:D377Y, ORF1a:P1640L, ORF1a:A3209V, ORF1a:V3718A, ORF1a:T3750I, ORF1b:P314L, ORF1b:G662S, ORF1b:P1000L, ORF1b:H1087Y, ORF1b:I1822V, ORF1b:A1884V, ORF3a:S26L, ORF7a:V82A, ORF7a:T120I, ORF9b:T60A, S:T19R, S:G142D, S:R158G, S:A222V, S:L452R, S:T478K, S:D614G, S:D950N, S:S1252F | ORF8:D119-, ORF8:F120-, S:E156-, S:F157-                                                      |

| Sequence name (including GISAID)      | Nexstrain clade | Pangolin lineage | IHU name   | Nucleotide substitutions | Nucleotide deletions | Amino acid substitutions | Amino acid deletions | Nucleotide substitutions                                                                                                                                                                                                                                                                                                                                                                                                                                                                      | Nucleotide deletions                                          | Amino acid substitutions                                                                                                                                                                                                                                                                                                                                                                                                                                 | Amino acid deletions                                                                                                                                          |
|---------------------------------------|-----------------|------------------|------------|--------------------------|----------------------|--------------------------|----------------------|-----------------------------------------------------------------------------------------------------------------------------------------------------------------------------------------------------------------------------------------------------------------------------------------------------------------------------------------------------------------------------------------------------------------------------------------------------------------------------------------------|---------------------------------------------------------------|----------------------------------------------------------------------------------------------------------------------------------------------------------------------------------------------------------------------------------------------------------------------------------------------------------------------------------------------------------------------------------------------------------------------------------------------------------|---------------------------------------------------------------------------------------------------------------------------------------------------------------|
| IHUMI-5002_EPI_ISL_8033351 2021-10-25 | 21J (Delta)     | AY.4.2           | IHUMI-5002 | 40                       | 13                   |                          | 4                    | G210T, C241T, T1391C, C1973T, C3037T, G4181T, C6402T, C7124T, C7851T, C8986T, G9053T, C10029T, A11201G, A11332G, C14408T, G15451A, C16466T, T17040C, C19220T, C21618G, C21846T, G21987A, T21995C, C22227T, T22917G, C22995A, A23403G, C23604G, G24410A, C25469T, C25614T, T26767C, T27638C, C27752T, C27874T, A28461G, G28881T, G28916T, G29402T, G29742T                                                                                                                                     | 22029-22034, 28248-28253, 28271                               | M:I82T, N:D63G, N:R203M, N:G215C, N:D377Y, ORF1a:S376P, ORF1a:A1306S, ORF1a:P2046L, ORF1a:P2287S, ORF1a:A2529V, ORF1a:V2930L, ORF1a:T3255I, ORF1a:T3646A, ORF1b:P314L, ORF1b:G662S, ORF1b:P1000L, ORF1b:A1918V, ORF3a:S26L, ORF7a:V82A, ORF7a:T120I, ORF7b:T40I, ORF9b:T60A, S:T19R, S:T95I, S:G142D, S:Y145H, S:R158G, S:A222V, S:L452R, S:T478K, S:D614G, S:P681R, S:D950N                                                                             | ORF8:D119-, ORF8:F120-, S:E156-, S:F157-                                                                                                                      |
| IHUMI-3795_EPI_ISL_8033481 2021-07-12 | 21F (Iota)      | B.1.526          | IHUMI-3795 | 37                       | 20                   |                          | 3                    | C241T, C1059T, C3037T, G6101A, A7201G, C8809T, T9867C, C14408T, A16500C, A20262G, C21575T, C21846T, A22320T, C22498T, G22992A, A23403G, A24432G, C25517T, G25563T, A25968G, C27739T, C27925T, C28311T, T28879G, G29254T, C29738A, T29753A, G29755A, G29757T, T29758G, G29759C, C29762G, A29763G, T29765A, A29768G, G29779A, T29785C                                                                                                                                                           | 11288-11296, 28271, 29740-29745, 29749-29750, 29770-29771     | N:P13L, N:S202R, ORF1a:T265I, ORF1a:G1946S, ORF1a:L3201P, ORF1b:P314L, ORF1b:Q1011H, ORF3a:P42L, ORF3a:Q57H, ORF7a:L116F, ORF8:T11I, ORF9b:P10S, S:L5F, S:T95I, S:D253V, S:S477N, S:D614G, S:Q957R                                                                                                                                                                                                                                                       | ORF1a:S3675-, ORF1a:G3676-, ORF1a:F3677-                                                                                                                      |
| IHUMI-4219_EPI_ISL_8033611 2021-07-22 | 21C (Epsilon)   | B.1.429          | IHUMI-4219 | 28                       | 3                    |                          | 1                    | C241T, C1059T, C2395T, T2597C, C3037T, C7056A, T7057A, G7058A, G7059A, C8947T, G10282A, G11083T, C12100T, A12878G, C14408T, G17014T, G21600T, G22018T, T22917G, A23403G, T24349C, G25563T, C26681T, G27890T, G28001T, A28272T, C28887T, C29362T                                                                                                                                                                                                                                               | 518-520                                                       | N:T205I, ORF1a:T265I, ORF1a:T2264K, ORF1a:G2265N, ORF1a:L3606F, ORF1a:I4205V, ORF1b:P314L, ORF1b:D1183Y, ORF3a:Q57H, S:S13I, S:W152C, S:L452R, S:D614G                                                                                                                                                                                                                                                                                                   | ORF1a:M85-                                                                                                                                                    |
| IHUMI-3964_EPI_ISL_8033762 2021-07-27 | 21H (Mu)        | B.1.621          | IHUMI-3964 | 32                       | 4                    |                          | 1                    | C241T, C3037T, A3428G, C4878T, C5192T, C6037T, C10029T, C11344T, A11451G, A13057T, C14408T, C17491T, C17707T, C18877T, T19035C, C20148T, C21846T, A21993C, T21995A, G22599A, G23012A, A23063T, A23403G, C23604A, G24410A, G25563T, A26492T, G27008C, C27925A, C28005T, A28272T, C28887T                                                                                                                                                                                                       | 26158-26161                                                   | M:K162N, N:T205I, ORF1a:T1055A, ORF1a:T1538I, ORF1a:T3255I, ORF1a:Q3729R, ORF1b:P314L, ORF1b:P1342S, ORF1b:P1414S, ORF3a:Q57H, ORF8:T11K, ORF8:P38S, S:T95I, S:Y144S, S:Y145N, S:R346K, S:E484K, S:N501Y, S:D614G, S:P681H, S:D950N                                                                                                                                                                                                                      | ORF3a:V256-                                                                                                                                                   |
| IHUMI-5227_EPI_ISL_8033859 2021-12-01 | 21K (Omicron)   | B.1.1.529        | IHUMI-5227 | 54                       | 36                   |                          | 15                   | C241T, A2832G, C3037T, T5386G, G5924A, G8393A, C10029T, C10449A, A11537G, T13195C, C14408T, C15240T, A18163G, C21762T, C21846T, G22578A, T22673C, C22674T, T22679C, C22686T, G22813T, G22898A, G22992A, C22995A, A23040G, G23048A, A23055G, A23063T, T23075C, C23202A, A23403G, C23525T, T23599G, C23604A, C23664T, C23854A, G23948T, C24130A, A24424T, T24469A, C24503T, C25000T, C25584T, C26270T, A26530G, C26577G, G26709A, A27259C, C27807T, A28271T, C28311T, G28881A, G28882A, G28883C | 6513-6515, 11285-11293, 21765-21770, 21987-21995, 28362-28370 | E:T9I, M:D3G, M:Q19E, M:A63T, N:P13L, N:R203K, N:G204R, ORF1a:K856R, ORF1a:V1887I, ORF1a:L2084I, ORF1a:A2710T, ORF1a:T3255I, ORF1a:P3395H, ORF1a:I3758V, ORF1b:P314L, ORF1b:I1566V, ORF9b:P10S, S:A67V, S:T95I, S:Y145D, S:G339D, S:S371L, S:S373P, S:S375F, S:K417N, S:G446S, S:S477N, S:T478K, S:Q493R, S:G496S, S:Q498R, S:N501Y, S:Y505H, S:T547K, S:D614G, S:H655Y, S:N679K, S:P681H, S:A701V, S:N764K, S:D796Y, S:N856K, S:Q954H, S:N969K, S:L981F | N:E31-, N:R32-, N:S33-, ORF1a:S2083-, ORF1a:L3674-, ORF1a:S3675-, ORF1a:G3676-, ORF9b:E27-, ORF9b:N28-, ORF9b:A29-, S:H69-, S:V70-, S:G142-, S:V143-, S:Y144- |
